# Supplementary material
Source: PubMed Central journal article supplement (PMC5179325)
Supplement: NIHMS803484-supplement-Supp_Info.pdf [file NIHMS803484-supplement-Supp_Info.pdf]

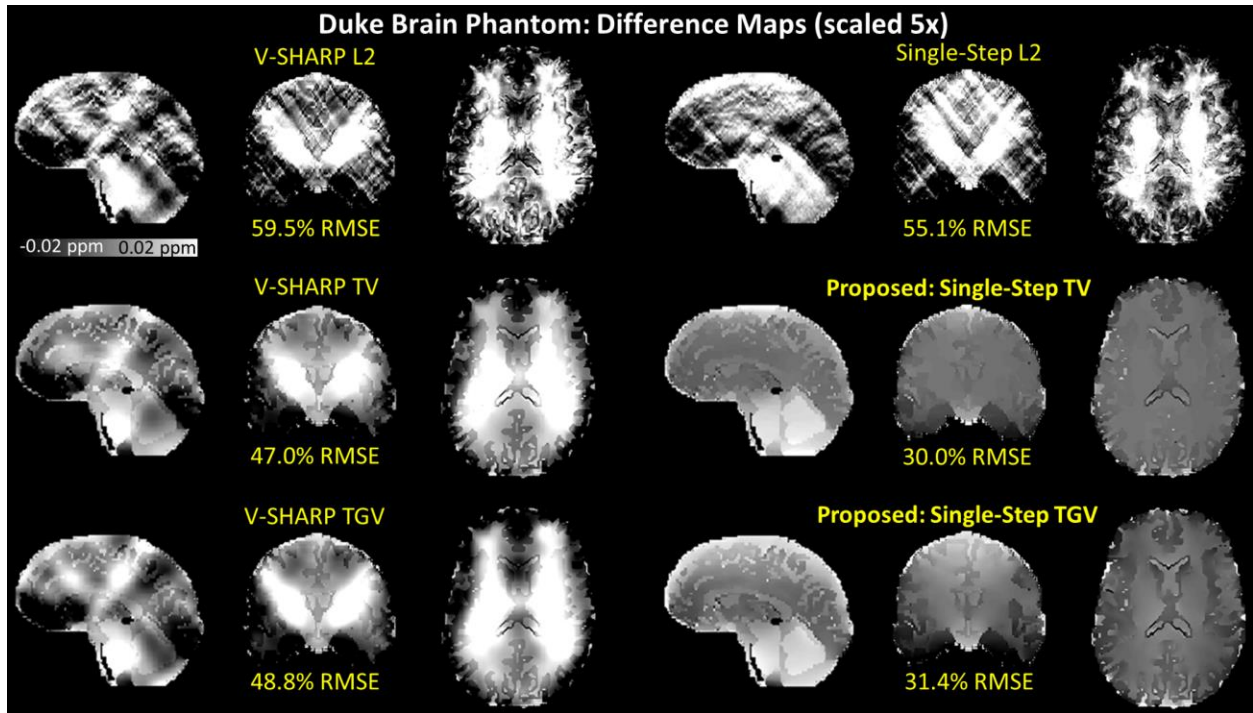

**Supplementary Figure 1.** Duke Brain Phantom. The difference maps between the reconstructed magnetic susceptibility maps and the underlying tissue susceptibility distribution with the corresponding RMSEs.

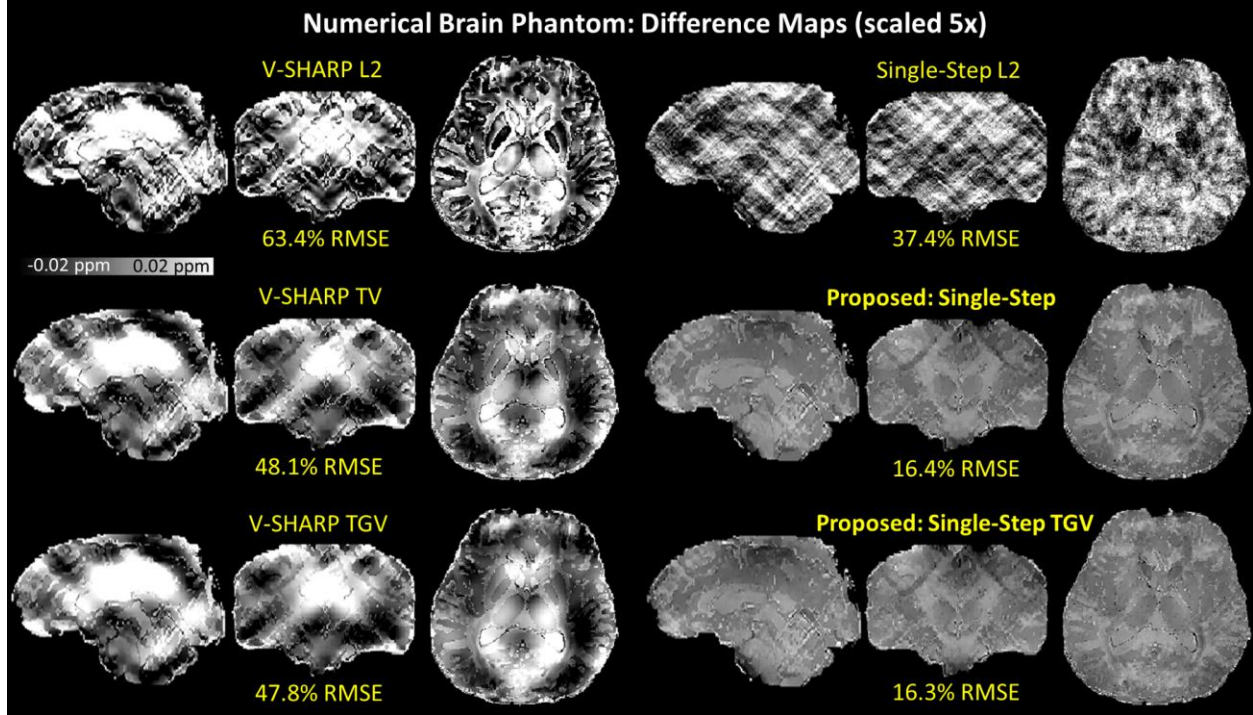

**Supplementary Figure 2.** Numerical Brain Phantom. The difference maps between the reconstructed magnetic susceptibility maps and the underlying tissue susceptibility distribution with the corresponding RMSEs.

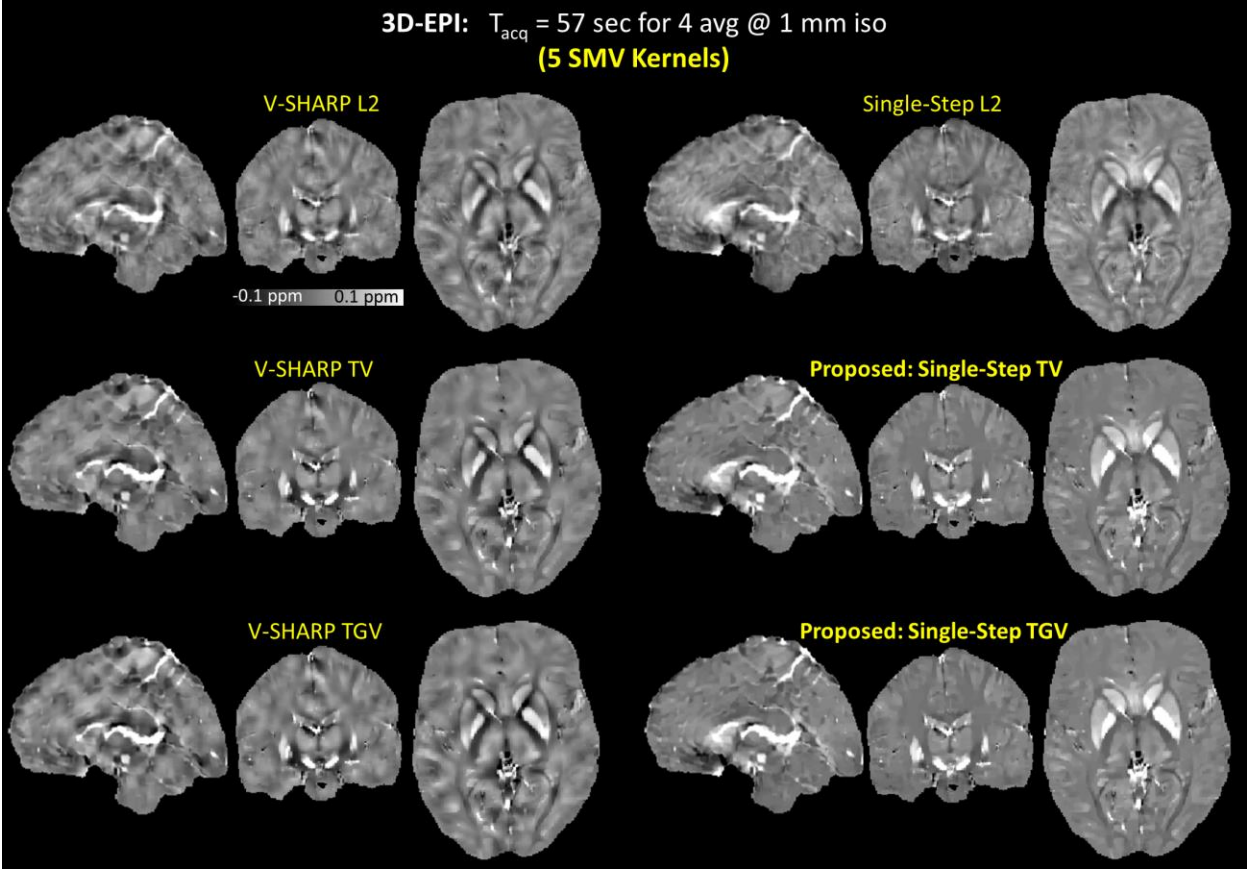

**Supplementary Figure 3.** 3D-EPI. The reconstructed magnetic susceptibility maps obtained from six different QSM algorithms with 5 SMV kernels.

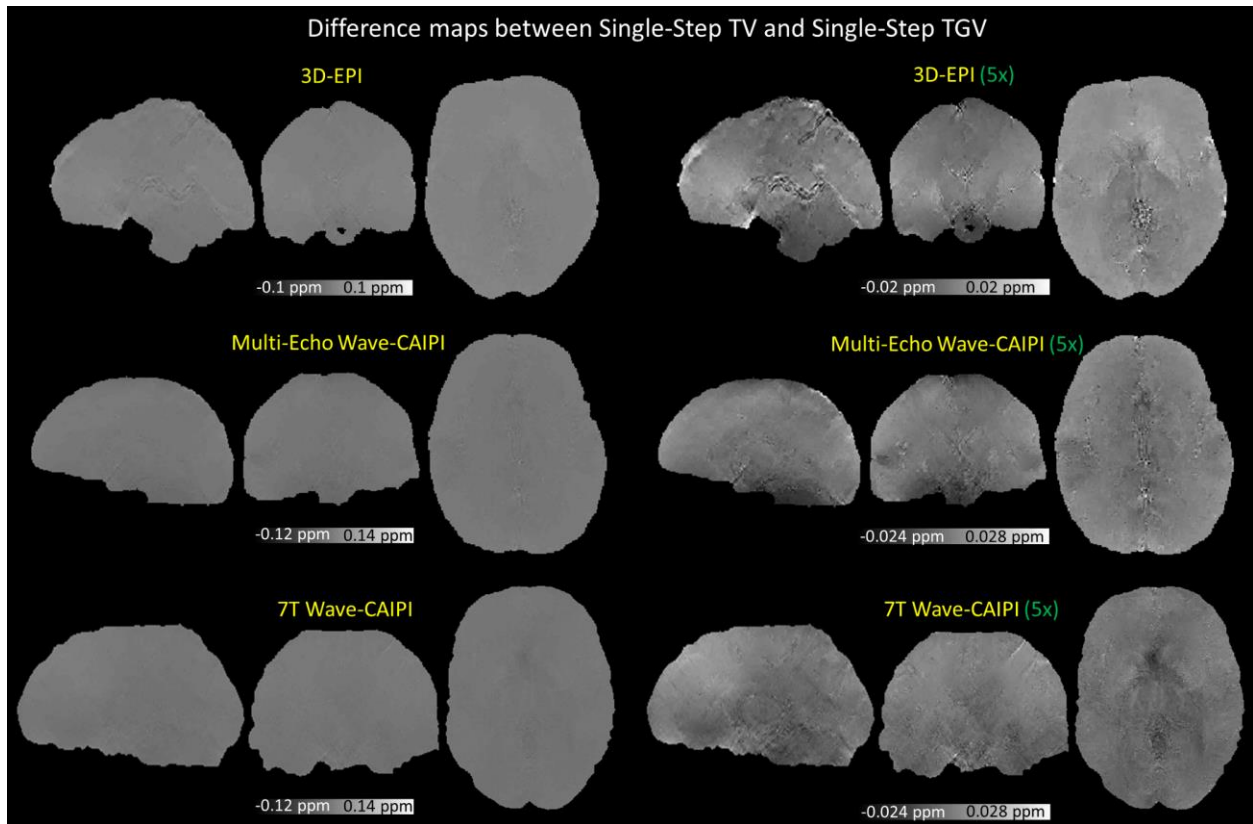

**Supplementary Figure 4.** *In vivo* data sets. The difference maps between the two proposed methods: Single-Step TV and Single-Step TGV.
